# Supplementary material for: Construction of Primary Chassis Cells with Efficient Protein Expression in Thermus thermophilus
Source: Research Square preprint supplement (doi:10.21203/rs.3.rs-6092828/v1), 2025-05-06
Supplement: Supplementary file 1 [file 7e6858ada3855ce3b52c2bfd.docx]

| 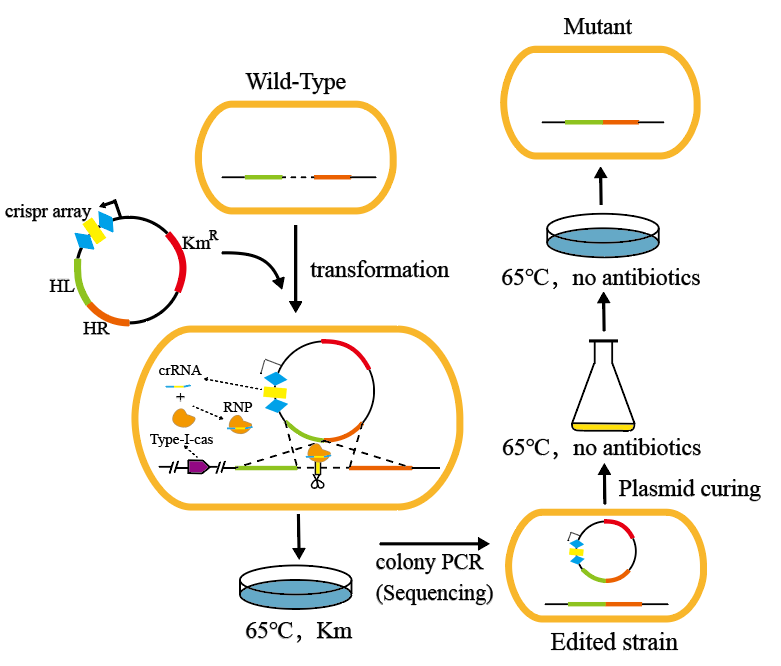 |
| --- |

**Fig. S1.** Schematic diagram of endogenous CRISPR-Cas-based gene editing technology. Diamond blocks: repetitive sequences; yellow squares: spacer region sequences designed according to the target gene; KanR: kanamycin resistance gene and RNP complex: ribonucleoprotein complex from the CRISPR-Cas system.

| 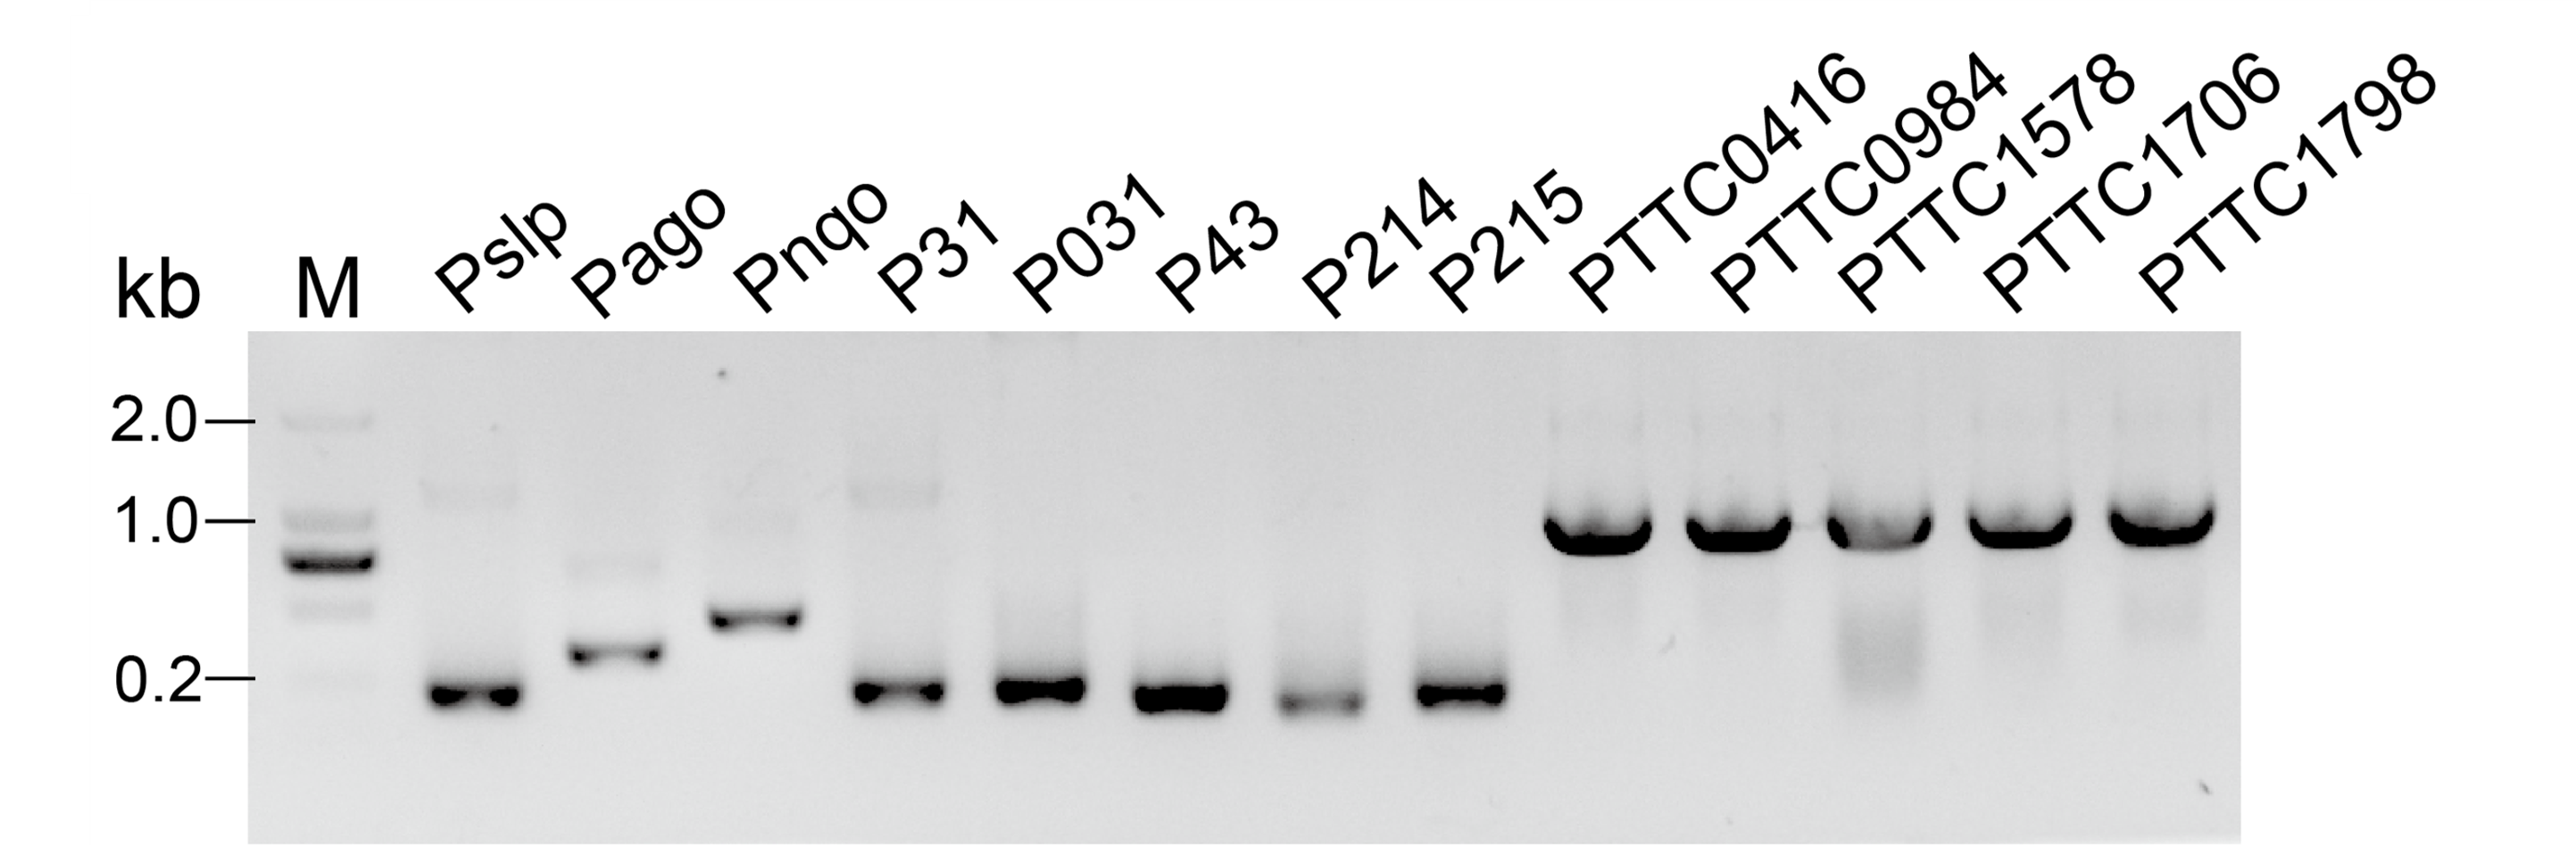 |
| --- |

**Fig. S2.** Construction of reporter gene expression vectors containing different promoters; **(A)** Colony PCR amplicons of the promoter insertion verification image (M: 2kb DNA Marker (2000, 1000, 750, 500, 250, 100), and 13 screened promoters).

| 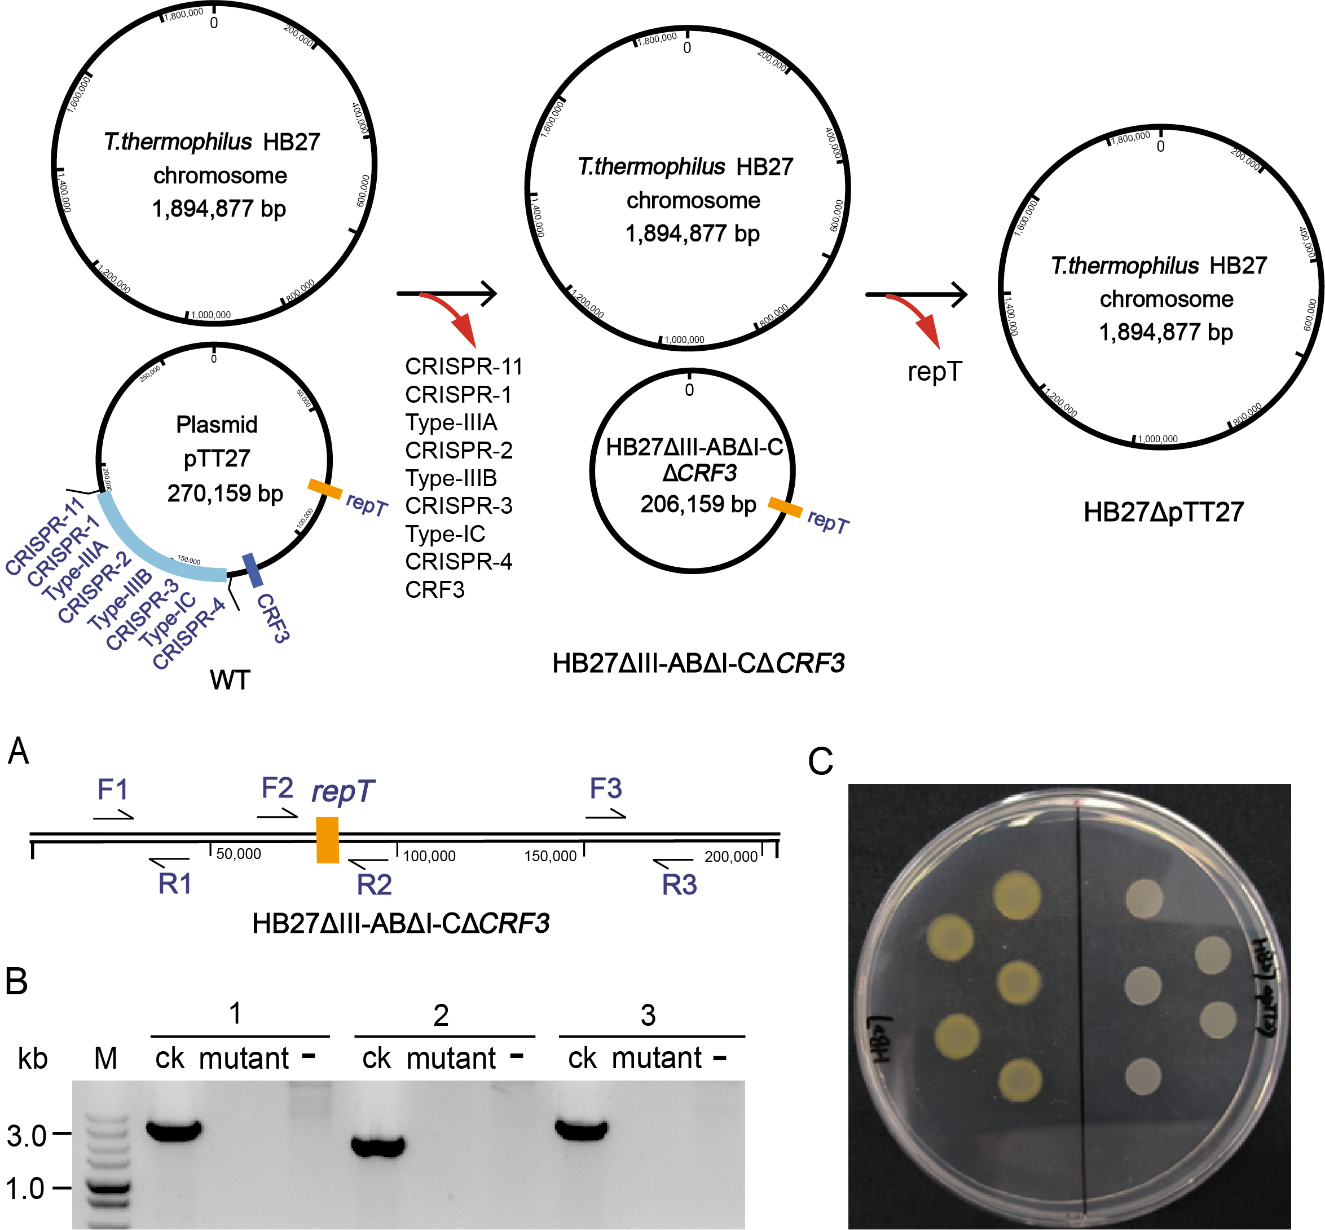 |
| --- |

**Fig. S3.** Construction of HB27 giant plasmid (pTT27)-free strain; **(A)** position of the three pairs of primers to verify the deletion mutant; **(B)** colony PCR amplicons of the giant plasmid deletion verification image (M: 5kb DNA Marker (5000, 3000, 2000, 1500, 1000, 750, 500, 250, 100), CK: HB27ΔIII-ABΔI-CΔ*CRF3*; mutant: plasmid-free stainHB27ΔpTT27 and -: negative control HB27). **(C)** Colony phenotyping of wild-type HB27 and giant plasmid-deficient strains HB27ΔpTT27 on the Right side.

| 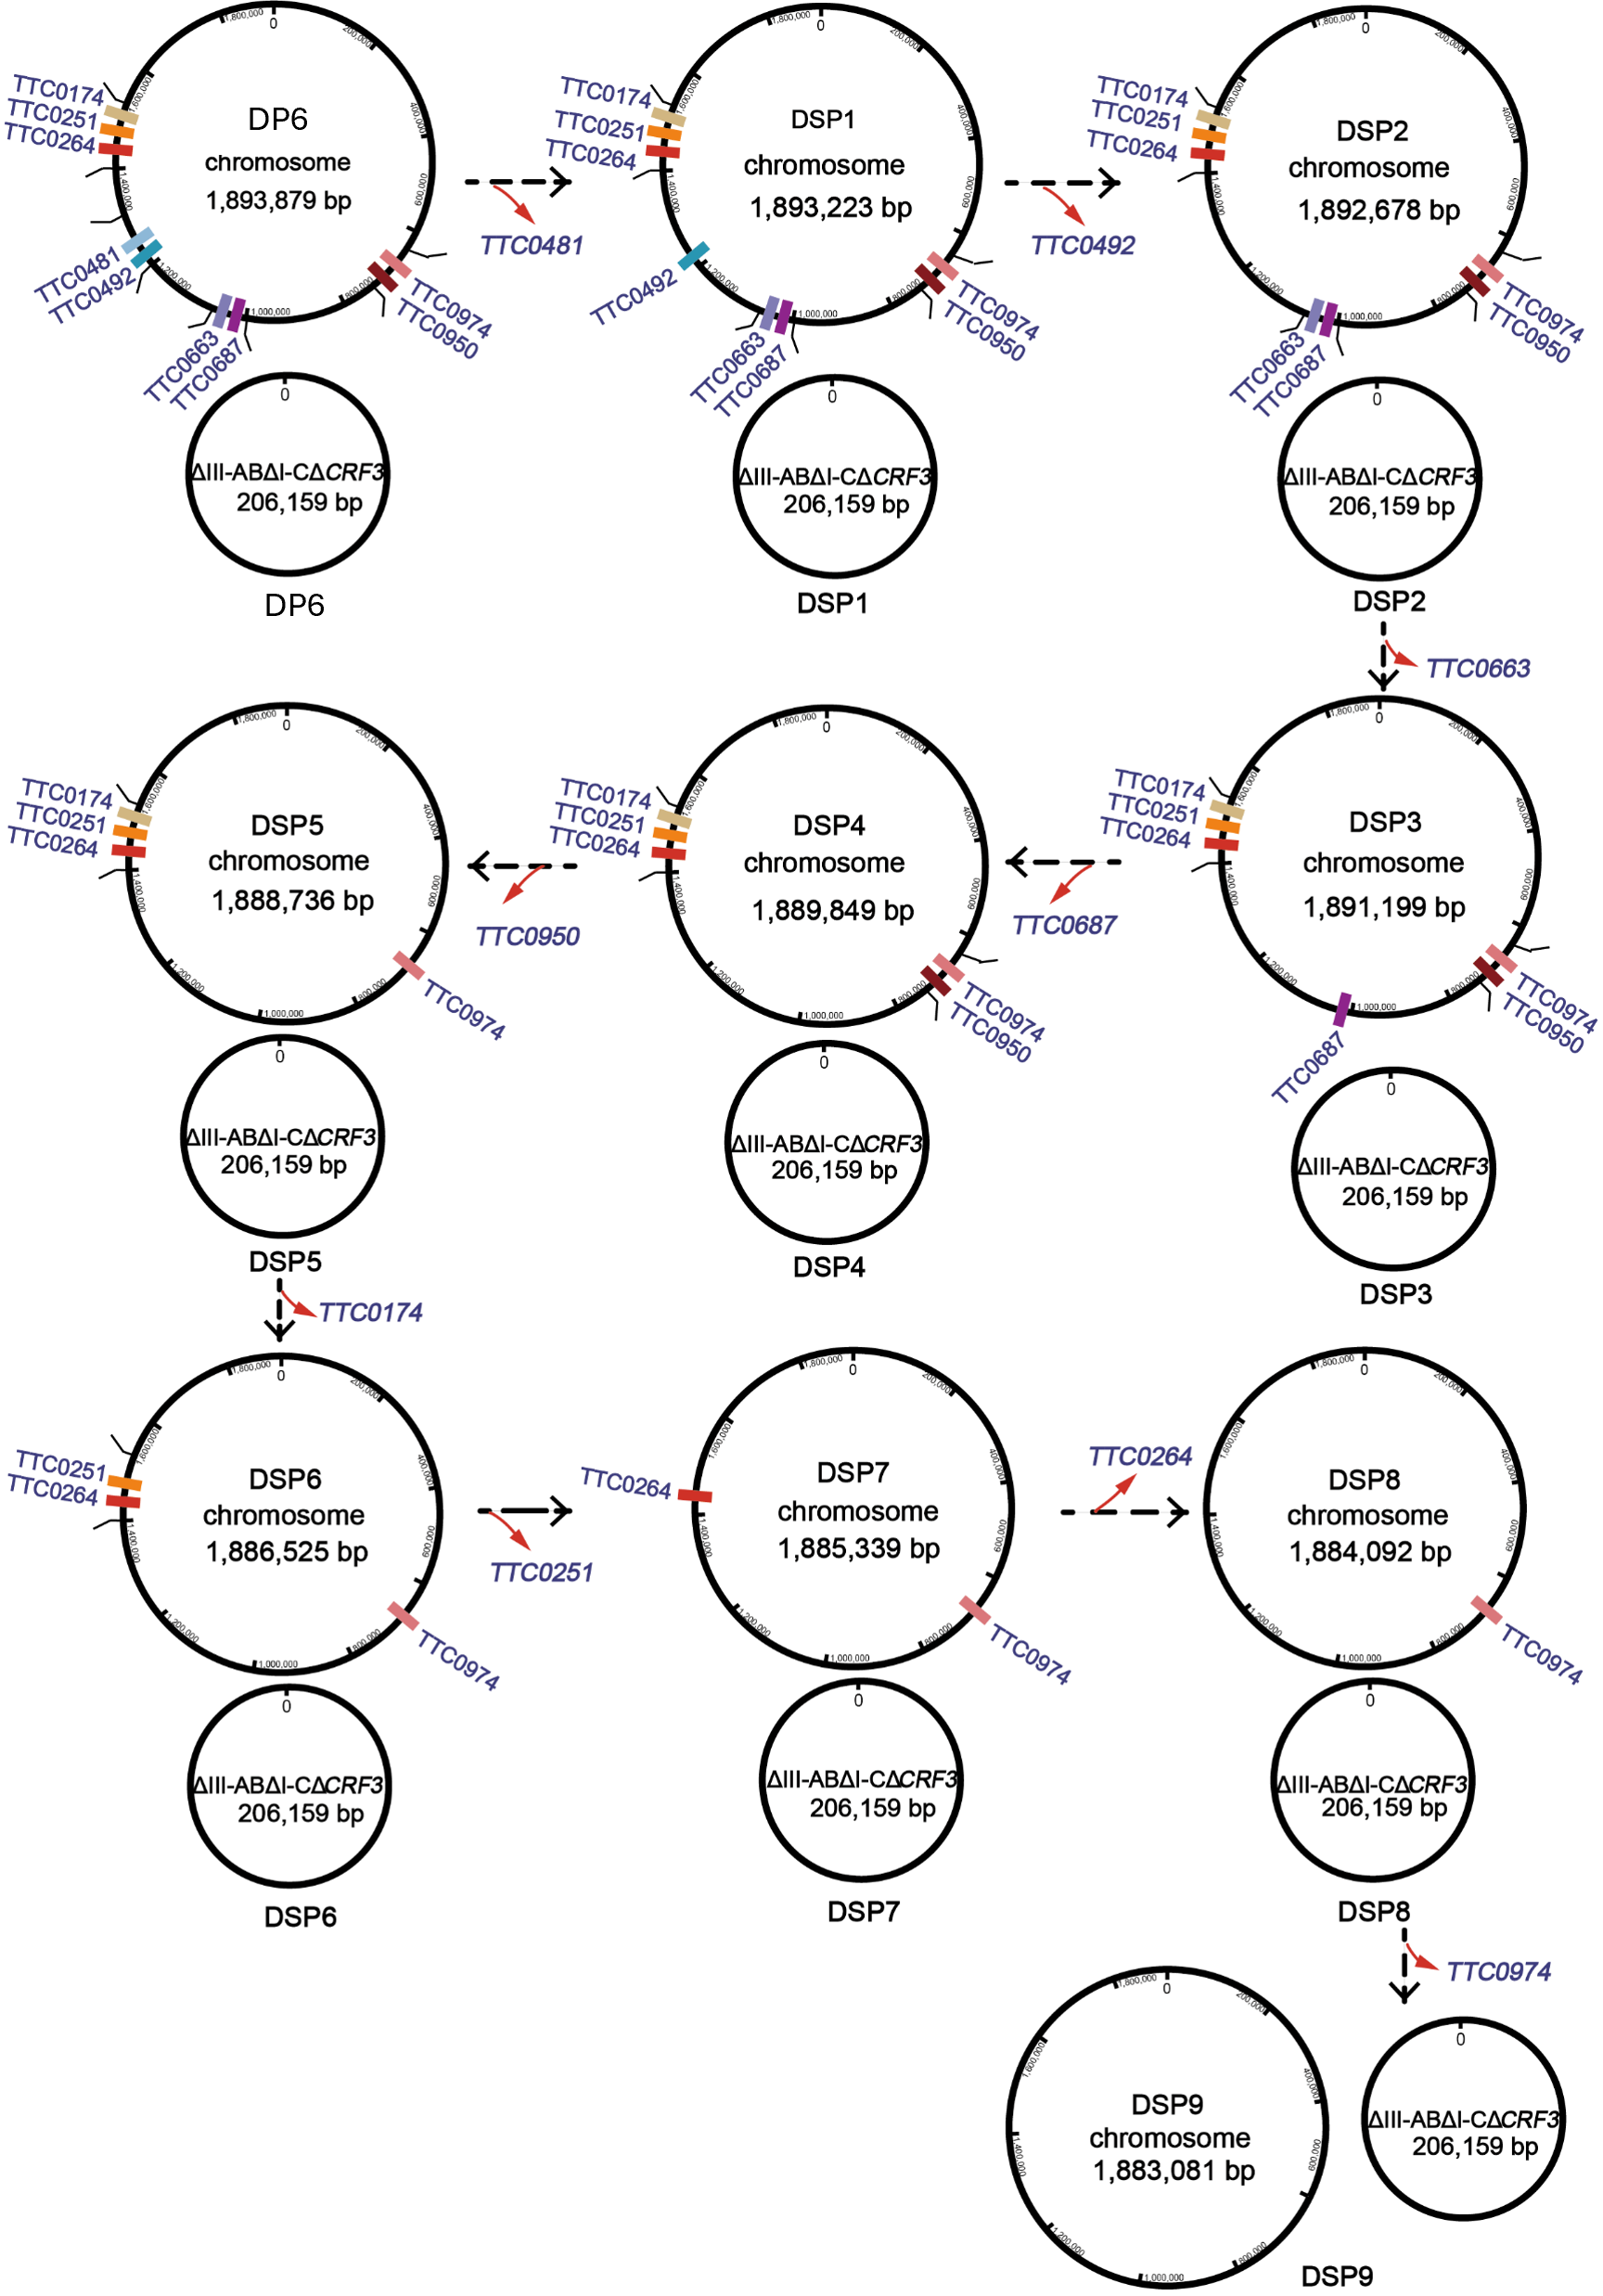 |
| --- |

**Fig. S4.** Schematic diagram of the accumulated knockout protease genes validation based on endogenous CRISPR-Cas system in *T. thermophilus* HB27 for enhanced heterologous protein expression.

| 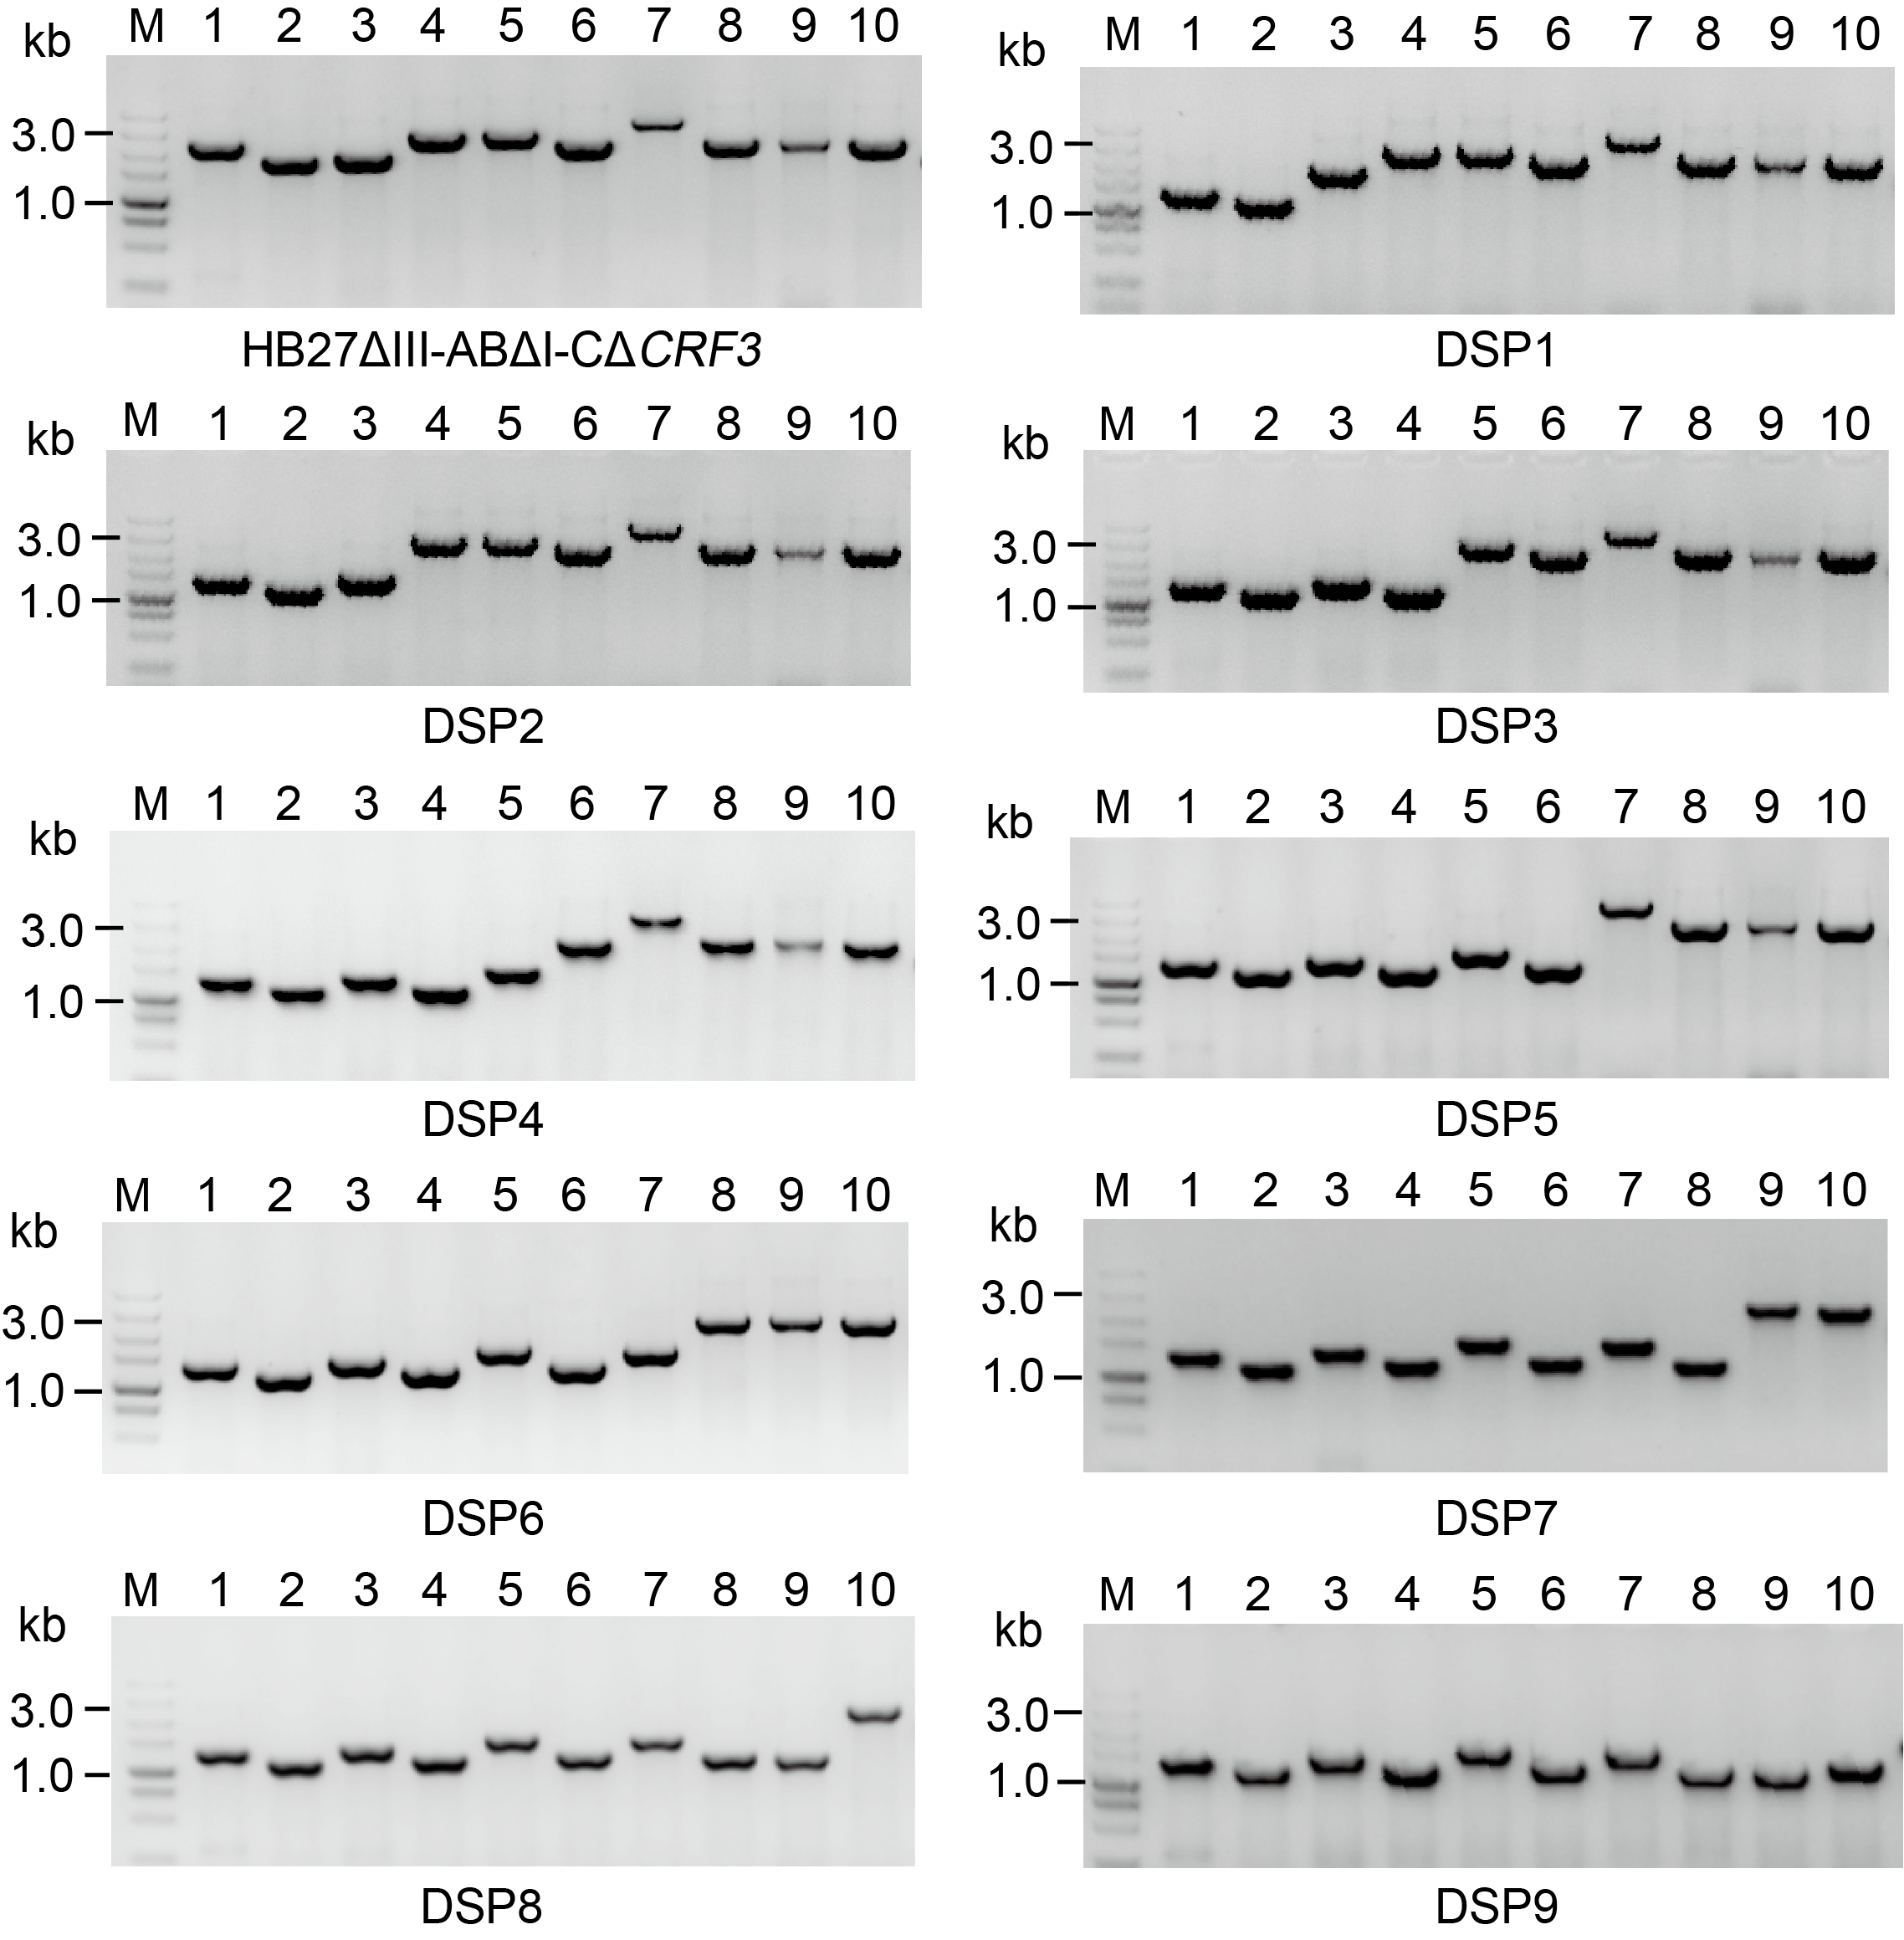 |
| --- |

**Fig. S5.** Construction and validation of accumulated defect protease genes strains. Colony PCR amplicons of protease gene deletion verification image (M: 5kb DNA Marker (5000, 3000, 2000, 1500, 1000, 750, 500, 250, 100); Ctrl.: HB27ΔIII-ABΔI-CΔCRF3, DSP1-9: protease deletion strains, lanes 1-10 represent proteas genes; 1 : TTC0417; 2 : TTC0481; 3 : TTC0492; 4 : TTC0663; 5 : TTC0687; 6 : TTC0950; 7 : TTC0174; 8 : TTC0251; 9 : TTC0264; 10 : TTC0974.

**Table S1.** *Thermus thermophilus* strains used in this study.

| **Strain name** | **Strain description** | **Strain source** |
| --- | --- | --- |
| *Thermus thermophilus*  HB27 | Originally isolated from Japan hot springs, commonly used in our lab for thermophiles studies. | Lab stock |
| HB27ΔIIIABΔICΔ*CRF3* | *T. thermophilus* HB27-based deletion of type I-C, III-A & B CRISPR-Cas system and *CRF3* (CRISPR-associated Rossmann Fold) | Lab stock |
| HB27ΔTTP0042 | *T. thermophilus HB27* based deletion of the β-galactosidase main source gene | Lab stock |
| HB27ΔpTT27 | *T. thermophilus HB27* based deletion of the giant plasmid | Current study |
| DP1 | HB27ΔIIIABΔICΔ*CRF3* based deletion of the protease gene TTC0035 | Current study |
| DP2 | HB27ΔIIIABΔICΔ*CRF3* based deletion of protease gene TTC0174 | Current study |
| DP3 | HB27ΔIIIABΔICΔ*CRF3* based deletion of the protease gene TTC0251 | Current study |
| DP4 | HB27ΔIIIABΔICΔ*CRF3* based deletion of the protease gene TTC264 | Current study |
| DP5 | HB27ΔIIIABΔICΔ*CRF3* based deletion of the protease gene TTC0265 | Current study |
| DP6 | HB27ΔIIIABΔICΔ*CRF3* based deletion of protease gene TTC0417 | Current study |
| DP7 | HB27ΔIIIABΔICΔ*CRF3* based deletion of protease gene TTC0481 | Current study |
| DP8 | HB27ΔIIIABΔICΔ*CRF3* based deletion of protease gene TTC0492 | Current study |
| DP9 | HB27ΔIIIABΔICΔ*CRF3* based deletion of protease gene TTC0663 | Current study |
| DP10 | HB27ΔIIIABΔICΔ*CRF3* based deletion of protease gene TTC0687 | Current study |
| DP11 | HB27ΔIIIABΔICΔ*CRF3* based deletion of protease gene TTC0950 | Current study |
| DP12 | HB27ΔIIIABΔICΔ*CRF3* based deletion of protease gene TTC0974 | Current study |
| DP13 | HB27ΔIIIABΔICΔ*CRF3* based deletion of the protease gene TTC1110 | Current study |
| DP14 | HB27ΔIIIABΔICΔ*CRF3* based deletion of the protease gene TTC1111 | Current study |
| DP15 | HB27ΔIIIABΔICΔ*CRF3* based deletion of the protease gene TTC1128 | Current study |
| DP16 | HB27ΔIIIABΔICΔ*CRF3* based deletion of the protease gene TTC1905 | Current study |
| DSP1 | HB27ΔIIIABΔICΔ*CRF3* based deletion of protease genes TTC0417, TTC0481 | Current study |
| DSP2 | HB27ΔIIIABΔICΔCRF3 based deletion of protease genes TTC0417, TC0481, TTC0492 | Current study |
| DSP3 | HB27ΔIIIABΔICΔ*CRF3* based deletion of protease genes TTC0417, TTC0481, TTC0492, TTC0663 | Current study |
| DSP4 | HB27ΔIIIABΔICΔ*CRF3* based deletion of protease genes TTC0417, TTC0481, TTC0492, TTC0663, TTC0687 | Current study |
| DSP5 | HB27ΔIIIABΔICΔ*CRF3* based deletion of protease genes TTC0417, TTC0481, TTC0492, TTC0663, TTC0687, TTC0950 | Current study |
| DSP6 | HB27ΔIIIABΔICΔ*CRF3* based deletion of protease genes TTC0417, TTC0481, TTC0492, TTC0663, TTC0687, TTC0950, TTC0174 | Current study |
| DSP7 | HB27ΔIIIABΔICΔ*CRF3* based deletion of protease genes TTC0417, TTC0481, TTC0492, TTC0663, TTC0687, TTC0950, TTC0174, TTC0251 | Current study |
| DSP8 | HB27ΔIIIABΔICΔ*CRF3* based deletion of protease genes TTC0417, TTC0481, TTC0492, TTC0663, TTC0687, TTC0950, TTC0174, TTC0251, TTC0264 | Current study |
| DSP9 | HB27ΔIIIABΔICΔ*CRF3* based deletion of protease genes TTC0417, TTC0481, TTC0492, TTC0663, TTC0687, TTC0950, TTC0174, TTC0251, TTC0264, TTC0974 | Current study |

**Table S2.** Primers used in the current study.

| **Primer name** | **Primer sequences (5`→3`)** |
| --- | --- |
| exam-LR-F | tgggggatacttggcaaacgc |
| exam-LR-R | ctacggggtctgacgctcag |
| pRK-TTP0042-F | atgaccgagaacgccgaaaaattcctttg |
| pRK-TTP0042-R | tggcgtttgccaagtatcccccatca |
| Pslp-F | gggatacttggcaaacgccaccgcttgacaagggcgcgtgag |
| Pslp-R | ttttcggcgttctcggtcatatgcctcacacctccttaagggtcgtgg |
| Pago-F | gggatacttggcaaacgccagtcaaagaagaagatccccacc |
| Pago-R | ttttcggcgttctcggtcatatcttggctcagatttgcatag |
| Pnqo-genome-F | cctccaggggccttctttcc |
| pRKSPnqo-R | ggtcccctcctttcgtgcctttc |
| P31-F | gggatacttggcaaacgccagaattcggcccaaggtttac |
| exam-42KO-R1 | ggtccaccaggcggtcgta |
| P031-F | cgcataccattttgatgggggatacttggcaaacgccaggtaggcccggtccctcggcc |
| P031-R | ccccaaaggaatttttcggcgttctcggtcatcccaaggtttacaaaatccccgccccc |
| P43-F | ggggatacttggcaaacgccacggtcttgtcaagtaagcttagctatggtaacatagac |
| P43-R | ccccaaaggaatttttcggcgttctcggtcatgagggcgaaggagggcttcaggttctc |
| P214-F | ccattttgatgggggatacttggcaaacgccatgcggggaaaggtactcgctgaggatt |
| P214-R | aaggaatttttcggcgttctcggtcatgcctcgggcaatcgctatggtacactctaagg |
| P215-F | tgggggatacttggcaaacgccacctgagtagcacttgacatcataaagtgcttgaggt |
| P215-R | ccactccccaaaggaatttttcggcgttctcggtcatcgcacggcgaactccacgctgg |
| P0416-F | atgggggatacttggcaaacgccacccaagtccttgcaggagcgcttcatcgctgcggt |
| P0416-R | caaaggaatttttcggcgttctcggtcatgggcacccccgaggaggaaggcgagttcgc |
| P0984-F | taccattttgatgggggatacttggcaaacgccacctggaggcgggccgggccctcaag |
| P0984-R | gaatttttcggcgttctcggtcatctctcacctcctcgcttctttgcccttccgggcgg |
| P1578-F | atgggggatacttggcaaacgccagggcaggtggaccacccgcaccgcc |
| P1578-R | ttcggcgttctcggtcatgcccccgagtttaggctaacctaaaaccggggtcaagggcc |
| pRKP31-F | aacttcatttttaatttaaaaggatctaggtgaagatc |
| pRKP31-R | ttaaatcaatctaaagtatatatgagtaaacttggtctgc |
| P1706-F | ttgatgggggatacttggcaaacgccacctcgaggacgaggacggccagatcgtgggca |
| P1706-R | atttttcggcgttctcggtcattcctcctcctctatccccgcttgcctcaggatgcgct |
| P1798-F | cattttgatgggggatacttggcaaacgccatggcgcggctttcccgggaggaaccccc |
| P1798-R | ccaaaggaatttttcggcgttctcggtcataccgcgaagagtctacccgccccctgcct |
| 0035-sp-F | aaacttctggttcttcttcatgcgggcccaggggggcgcggggcag |
| 0035-sp-R | caacctgccccgcgcccccctgggcccgcatgaagaagaaccagaa |
| 0035-HL-F | tatactttagattgatttaaatccgccctttaagcccctcgg |
| 0035-HL-R | cggagctattcctgccctagggtctacctcccttgccctatggtagcg |
| 0035-HR-F | tagggcaagggaggtagaccctagggcaggaatagctccgcccg |
| 0035-HR-R | tttaaattaaaaatgaagttgcccaggcctcggtgaaaagct |
| 0035-verify-sp-F | tggttcttcttcatgcgggc |
| 0174-SP-F | aaacattgacgagcttcacaccctgatcggggcgggcggggccgag |
| 0174-SP-R | caacctcggccccgcccgccccgatcagggtgtgaagctcgtcaat |
| 0174-HL-F | tatactttagattgatttaacccctcctccacctccatggc |
| 0174-HL-R | ccttggccatccccaggggggctcccctctacctcacattctagcct |
| 0174-HR-F | aatgtgaggtagaggggagcccccctggggatggccaag |
| 0174-HR-R | cttttaaattaaaaatgaagtttctgcacggagtccacgaagagga |
| verify-0174-sp-F | ttcacaccctgatcggggc |
| 0251-sp-F | aaacctggacgtgcccttcgccatcgccgacgccaccaccctcacc |
| 0251-sp-R | caacggtgagggtggtggcgtcggcgatggcgaagggcacgtccag |
| 0251-HL-F | tatactttagattgatttaatcttcctgggcacccccatagacg |
| 0251-HL-R | caaaaggggcttggtcgcccctaggcctcttcacgggtcaccac |
| 0251-HR-F | tgacccgtgaagaggcctaggggcgaccaagccccttttgg |
| 0251-HR-R | ttttaaattaaaaatgaagttggcgccccggccctg |
| verify-0251-sp-F | tggacgtgcccttcgc |
| 0264-sp-F | aaacgtgaaggtggaggccaccaagttcaccgaggtggggtacgtg |
| 0264-sp-R | caaccacgtaccccacctcggtgaacttggtggcctccaccttcac |
| 0264-HL-F | tactttagattgatttaagggtcaccgccctcgcc |
| 0264-HL-R | tccttcctcctttacagccttcatgcttcccccaaagtgaggacg |
| 0264-HR-F | tcactttgggggaagcatgaaggctgtaaaggaggaaggatgcg |
| 0264-HR-R | ttttaaattaaaaatgaagttccttgtcccgctcgcccag |
| verify-0264-sp-F | aaggtggaggccaccaag |
| 0265-sp-F | aaacgccgggggcgtggccgacgccatggccctcctggagcgcttt |
| 0265-sp-R | caacaaagcgctccaggagggccatggcgtcggccacgcccccggc |
| 0265-HL-F | tatatactttagattgatttaatccccacccgctacccggac |
| 0265-HL-R | tcggcgggcgtcaggttcatgagaagggcgttaggctaggcgg |
| 0265-HR-F | cctagcctaacgcccttctcatgaacctgacgcccgccg |
| 0265-HR-R | cttttaaattaaaaatgaagttaggacccccatgaaggggagg |
| verify-0265-sp-F | gccatggccctcctgga |
| 0417-sp-F | aaaccgggtggaggtggcggaaggcccccggggcacgggctttttc |
| 0417-sp-R | caacgaaaaagcccgtgccccgggggccttccgccacctccacccg |
| 0417-FL-F | atatactttagattgatttaacgggaacctgggggaggtc |
| 0417-FL-R | ggtcctaagcgcccacgccggg |
| 0417-FR-F | ctagcggccgtacaccacgctcggaagc |
| verify-0417-sp-F | aggtggcggaaggccc |
| 0481-sp-F | aaactcctcctcgtgggcttcggctgggcgcgccccgtgcccatct |
| 0481-sp-R | caacagatgggcacggggcgcgcccagccgaagcccacgaggagga |
| 0481-HR-F | gtgtccgcacgtcggcttcgcag |
| 0481-HR-R | ttttaaattaaaaatgaagttgcggtttgaggagctcgcctggc |
| verify-0481-sp-F | tcctcgtgggcttcggct |
| 0492-sp-F | aaaccgccgcctcttccccgcctccttccgcgaggccgaggccctg |
| 0492-sp-R | caaccagggcctcggcctcgcggaaggaggcggggaagaggcggcg |
| 0492-verify-sp-F | tcttccccgcctccttcc |
| 0492-HL-F | tatactttagattgatttaatactgcgcccacgcgggg |
| 0492-HL-R | gactttggggaaggtttttgtcacccctgccccagggcgaag |
| 0492-HR-F | tcgccctggggcaggggtgacaaaaaccttccccaaagtcaagggcaaag |
| 0492-HR-R | tttaaattaaaaatgaagttcccttcttgagaagcctggcgatgg |
| 0663-sp-F | aaacctcgggaacctctccttcacctgcccaaactccatccccacg |
| 0663-sp-R | caaccgtggggatggagtttgggcaggtgaaggagaggttcccgag |
| 0663-verify-sp-F | tctccttcacctgcccaaac |
| 0663-HL-F | tatactttagattgatttaaggaggagcttggccacctcagcca |
| 0663-HL-R | tgctccttccttcttccgccgactcgcttcccctcgaaaacagagttct |
| 0663-HR-F | ttttcgaggggaagcgagtcggcggaagaaggaaggagcagggag |
| 0663-HR-R | tttaaattaaaaatgaagttaaggcgtcagggaaggctacctcag |
| 0687-sp-F | aaacctcgccctctacttcgccggggggtggcttgcggggctttcc |
| 0687-sp-R | caacggaaagccccgcaagccaccccccggcgaagtagagggcgag |
| 0687-verify-sp-F | gtggcttgcggggcttt |
| 0687-HL-F | tatactttagattgatttaagttccagacccagacctcaagccccgct |
| 0687-HL-R | gatgcccagtccttccatagcgcccttattctataggcccgcagggaa |
| 0687-HR-F | gggcctatagaataagggcgctatggaaggactgggcatcgttttcctgg |
| 0687-HR-R | tttaaattaaaaatgaagttccccgccccgcccaccaggc |
| 0950-sp-F | aaacctcctcttccgggccctcccctgggaggcgggggccttgggc |
| 0950-sp-R | caacgcccaaggcccccgcctcccaggggagggcccggaagaggag |
| verify-0950-sp-F | tcctcttccgggccctcc |
| 0950-HL-F | atatactttagattgatttaaagttcaaggcgatggccccgg |
| 0950-HL-R | catagttttgcacccccagggcctcagtataggggcgggtggg |
| 0950-HR-F | acccgcccctatactgaggccctgggggtgcaaaactatgcggaggtga |
| 0950-HR-R | tttaaattaaaaatgaagttcgaggagggccaggttctcggtg |
| 0974-sp-F | aaaccgcaaccggagcgtggccgccttcttctggggcctgaagccc |
| 0974-sp-R | caacgggcttcaggccccagaagaaggcggccacgctccggttgcg |
| 0974-verify-sp-F | gccttcttctggggcctgaa |
| 0974-HL-F | tatactttagattgatttaacgccatcgtggccgtggccgggccgagcc |
| 0974-HL-R | tcggcgaggaccttccctgaggccccatgataccccttcgccc |
| 0974-HR-F | cgaaggggtatcatggggcctcagggaaggtcctcgccgaggcc |
| 0974-HR-R | tttaaattaaaaatgaagttccccgcccggcctcaggggggcctaccagg |
| 1110-sp-F | aaactcctggagctccttcttgggcccacccaggtggtggccaaga |
| 1110-sp-R | caactcttggccaccacctgggtgggcccaagaaggagctccagga |
| verify-1110-sp-F | cacccaggtggtggccaa |
| 1110-HL-F | tatactttagattgatttaactccgccaccccgccaag |
| 1110-HL-R | tgaccttcatgggccccagttcatcgcggcggaccctggc |
| 1110-HR-F | gccagggtccgccgcgatgaactggggcccatgaaggtcaagga |
| 1110-HR-R | tttaaattaaaaatgaagttagatagaagatctccaacaggtgttccgcg |
| 1111-sp-F | aaacttcatcctctccgtcctctccccctacttccagcagcagtgg |
| 1111-sp-R | caacccactgctgctggaagtagggggagaggacggagaggatgaa |
| verify-1111-sp-F | tctccccctacttccagcag |
| 1111-HL-F | tatactttagattgatttaagggtgggggccttcctctcc |
| 1111-HL-R | atgtcgtgcagggggatcatgcctcacctccggcaaggtcatttta |
| 1111-HR-F | gaccttgccggaggtgaggcatgatccccctgcacgacatcaacc |
| 1111-HR-R | ttttaaattaaaaatgaagttcccaggtaaaagcccgcggg |
| 1128-sp-F | aaactcccgcaacggccgggccgggccttcggactccgccttcagc |
| 1128-sp-R | caacgctgaaggcggagtccgaaggcccggcccggccgttgcggga |
| verify-1128-sp-F | ccttcggactccgccttca |
| 1128-HL-F | tatactttagattgatttaactccaccagcttgcggaggatca |
| 1128-HL-R | ctgcggccctttgcggggcggtcttccttcaaggtacaccggggg |
| 1128-HR-F | ggtgtaccttgaaggaagaccgccccgcaaagggccg |
| 1128-HR-R | ttttaaattaaaaatgaagttccctcgcggtggacaaggacc |
| 1905-sp-F | aaacttcgtggggccgagccaggtggtcaccaactaccacgtgatc |
| 1905-sp-R | caacgatcacgtggtagttggtgaccacctggctcggccccacgaa |
| verify-1905-sp-F | agccaggtggtcaccaac |
| 1905-HL-F | atactttagattgatttaacgacaaggaggaggcggcgc |
| 1905-HL-R | ccttcaaggtgggcatggccgggcctacattacctcaggcgcgg |
| 1905-HR-F | gcctgaggtaatgtaggcccggccatgcccaccttgaaggagctc |
| 1905-HR-R | ttaaattaaaaatgaagttggaaggcgtagacctcgggggc |
| 0035-genome-F | tccccggcctcaagccacatggcggcgg |
| 0035-exam-sp-F | ccaggtctcccggcgcttccaggttcccctg |
| 0035-genome-R | ccttgcggtaggcctcgctctcgttcagcttccggca |
| 0174-genome-F | cgtcctccacggggcccacgtaggtcttgaacatcatgttgaagtagcg |
| 0174-exam-sp-F | ggggcgagtttgaggagcgcctgcggcagatcattgag |
| 0174-genome-R | ccccgcctcctccatgcggaagaccccgatctcc |
| 0251-genome-F | ccgcctcctcaagcgcctggtctacggggtg |
| 0251-exam-sp-F | gagggccgcctgggtgaagcggagctctatccc |
| 0251-genome-R | tcattgagcagacggcccgcggcgagcgc |
| 0264-genome-F | ggcggcgtggagattcacggcaccaccatcctcg |
| 0264-exam-sp-F | gggaaagaccgagatcgcccgccgcctcgc |
| 0264-genome-R | gagtgtcctcgagggccagggcctgcttgaggg |
| 0265-genome-F | cctggggtcactccatcctggacctcctggccgaccttcc |
| 0265-exam-sp-F | tcctccgccacctccaggccatgatcgtggcc |
| 0265-genome-R | ttgtctataaggcgctcggcgtgctggttcttcagcacctcccg |
| 0417-genome-F | aggacctcgaggcctacctgggcgtccccaagt |
| 0417-exam-sp-F | aggtggcggaaggcccccggggca |
| 0417-genome-R | tttggtccttatctttttggtgctgggcacgatctttctggggcttgcc |
| 0481-genome-F | cgctcccgccccgtcctcctcgtggagaacacc |
| 0481-exam-sp-F | gaagagaacggcgagggccaggttcaccaggatcccgg |
| 0481-genome-R | tggccttcctcctcggggccttcgggctcatcctcc |
| 0492-genome-F | ctccaaagcctccggagggccctcgccctaaagcc |
| 0492-exam-sp-F | gggcgtcctcgcccacttcctccacaacgcca |
| 0492-genome-R | ccctgagctcctccagaaaggcctcccggaggtcctg |
| 0663-genome-F | gatgcgccaaacccggcccaccttcactgcg |
| 0663-exam-sp-F | gaaccccgcggagaagtcccgcaccctcacc |
| 0663-genome-R | cggggtctggtacgccgtgcggaacaagggatggaa |
| 0687-genome-F | ttggaccaaacgggcatcggccgtccaaaccaccttacacccccaa |
| 0687-exam-sp-F | ccctccaggagccccaggccgcggaccaaaa |
| 0687-genome-R | cttctccagcacggtcttggagatgcggtcggggttctccagg |
| 0950-genome-F | agcacccagaggatgggcaggaaggacagggcgttg |
| 0950-exam-sp-F | ggagggtctaccgggcgctcctcgccctgaggaa |
| 0950-genome-R | aggcgttcccgcttgctgaagctgtccgggcttacc |
| 0974-genome-F | aaggtggcggaagaacggggggcgccccttta |
| 0974-exam-sp-F | gggggttcccggagctcaaagaccaccacgggcttc |
| 0974-genome-R | gcttcttccgggggcggacggaggtggccatc |
| 1110-genome-F | cccaggtggcctcgttcttgcggcggagcagatcg |
| 1110-exam-sp-F | ctgcccgcgggcttttacctggggtactgggc |
| 1110-genome-R | gggctggttcaggcgcttgaagataaaggccatcacctgggcc |
| 1111-genome-F | ttcaccgcgggcaccgccctcctcttccacg |
| 1111-exam-sp-F | gagcaggtcctgagggccatccgcctcacggac |
| 1111-genome-R | gcacgcccaaaagcccctgcaccagctggag |
| 1128-genome-F | gggagcgggtcctggacgtgtacagctacgtgggg |
| 1128-exam-sp-F | atgaggaggcccacgaggaggaggggccagaggaa |
| 1128-genome-R | gcgggcacggtgatcaccgccttggtgatcttttcccc |
| 1905-genome-F | cctacgagaccgtcctcctggaggggcggcagatgt |
| 1905-exam-sp-F | acctcttcaccgacgcccccctcaccgtagggaactc |
| 1905-genome-R | gtgccgtggaagtccaggtggtcgtcggggtagaagttcacg |
| exam-pTT27-F1 | gcaactacctggacatctggcgcgtcctgcccttcttccactacctga |
| exam-pTT27-R1 | tggcctttgacatggacaaggcgcaggtggtgcggac |
| exam-pTT27-F2 | acacccgtcctcctgacctttgcaaggcaagcccactc |
| exam-pTT27-R2 | ccccgatggcgaagagggcggtcctaagttcttccaggtagtc |
| exam-pTT27-F3 | gcttcccttcggtccgggcctccctccgtagctt |
| exam-pTT27-R3 | ggcggacgcgaggcggcttggggagcttctcctttc |
| repT-sp-F | aaacaccaccacggcctaccagatcctcaagctcatgggcttcgac |
| repT-sp-R | caacgtcgaagcccatgagcttgaggatctggtaggccgtggtggt |
| verify-repT-sp-F | ggcctaccagatcctcaagc |

**Table S3.** Plasmids used in the current study.

| **Plasmid name** | **Plasmid description** | Source |
| --- | --- | --- |
| pRKP31 | The backbone plasmid used to construct promoter screening plasmids | Lab stock |
| pRKP31-AC3 | The knockout plasmid based on endogenous CRISPR type I-B system | Lab stock |
| pRKPslp-TTP0042 | To monitor TTP0042 expression level based on the Pslp promoter | Lab stock |
| pRKPnqo-TTP0042 | To monitor TTP0042 expression level based on the Pnqo promoter | Current study |
| pRKPago-TTP0042 | To monitor TTP0042 expression level based on the Pago promoter | Current study |
| pRKP31-TTP0042 | To monitor TTP0042 expression level based on the P31 promoter | Lab stock |
| pRKP031-TTP0042 | To monitor TTP0042 expression level based on the P031 promoter | Current study |
| pRKP43-TTP0042 | To monitor TTP0042 expression level based on the P43 promoter | Current study |
| pRKP214-TTP0042 | To monitor TTP0042 expression level based on the P214 promoter | Current study |
| pRKP215-TTP0042 | To monitor TTP0042 expression level based on the P215 promoter | Current study |
| pRKP0416-TTP0042 | To monitor TTP0042 expression level based on the P0416 promoter | Current study |
| pRKP0984-TTP0042 | To monitor TTP0042 expression level based on the P0984 promoter | Current study |
| pRKP1578-TTP0042 | To monitor TTP0042 expression level based on the P1578 promoter | Current study |
| pRKP1706-TTP0042 | To monitor TTP0042 expression level based on the P1706 promoter | Current study |
| pRKP1798-TTP0042 | To monitor TTP0042 expression level based on the P1798 promoter | Current study |
| pRKP31-repT-AC3 | An editing plasmid for knockdown of the repT gene using the type I-B system | Current study |
| pRKP31-TTC0035-AC3 | An editing plasmid for knockdown of the TTC0035 gene using the type I-B system | Current study |
| pRKP31-TTC0174-AC3 | An editing plasmid for knockdown of the TTC0174 gene using the type I-B system | Current study |
| pRKP31-TTC0251-AC3 | An editing plasmid for knockdown of the TTC0251 gene using the type I-B system | Current study |
| pRKP31-TTC0264-AC3 | An editing plasmid for knockdown of the TTC0264 gene using the type I-B system | Current study |
| pRKP31-TTC0265-AC3 | An editing plasmid for knockdown of the TTC0265 gene using the type I-B system | Current study |
| pRKP31-TTC0417-AC3 | An editing plasmid for knockdown of the TTC0417 gene using the type I-B system | Current study |
| pRKP31-TTC0481-AC3 | An editing plasmid for knockdown of the TTC0481 gene using the type I-B system | Current study |
| pRKP31-TTC0492-AC3 | An editing plasmid for knockdown of the TTC0492 gene using the type I-B system | Current study |
| pRKP31-TTC0663-AC3 | An editing plasmid for knockdown of the TTC0663 gene using the type I-B system | Current study |
| pRKP31-TTC0687-AC3 | An editing plasmid for knockdown of the TTC0687 gene using the type I-B system | Current study |
| pRKP31-TTC0950-AC3 | An editing plasmid for knockdown of the TTC0950 gene using the type I-B system | Current study |
| pRKP31-TTC0974-AC3 | An editing plasmid for knockdown of the TTC0974 gene using a type I-B system | Current study |
| pRKP31-TTC1110-AC3 | An editing plasmid for knockdown of the TTC1110 gene using the type I-B system | Current study |
| pRKP31-TTC1111-AC3 | An editing plasmid for knockdown of the TTC1111 gene using the type I-B system | Current study |
| pRKP31-TTC1128-AC3 | An editing plasmid for knockdown of the TTC1128 gene using the type I-B system | Current study |
| pRKP31-TTC1905-AC3 | An editing plasmid for knockdown of the TTC1905 gene using the type I-B system | Current study |
